# Supplementary material
Source: publisher site journal article supplement (https://www.dovepress.com/get_supplementary_file.php?f=349235.docx)
Supplement: Supplementary file 1 [file get_supplementary_file.php]

**Table S1** Functional enrichment analysis of the DEGs

| **Category** | **Term** | **Count** | **GeneRatio** | **PValue** |
| --- | --- | --- | --- | --- |
| MF | GO:0016525~negative regulation of angiogenesis | 10 | 1.724 | 1.55E-04 |
| MF | GO:0006783~heme biosynthetic process | 6 | 1.03448275 | 4.52E-04 |
| MF | GO:0034976~response to endoplasmic reticulum stress | 10 | 1.72413793 | 6.63E-04 |
| MF | GO:0006886~intracellular protein transport | 18 | 3.10344827 | 0.00171762 |
| MF | GO:0002576~platelet degranulation | 11 | 1.89655172 | 0.00178777 |
| MF | GO:0030308~negative regulation of cell growth | 12 | 2.06896551 | 0.00183371 |
| MF | GO:0000122~negative regulation of transcription from RNA polymerase II promoter | 39 | 6.72413793 | 0.00200303 |
| MF | GO:0007507~heart development | 15 | 2.58620689 | 0.00246261 |
| MF | GO:0009306~protein secretion | 6 | 1.03448275 | 0.00333935 |
| MF | GO:0016192~vesicle-mediated transport | 13 | 2.24137931 | 0.00378972 |
| MF | GO:0030512~negative regulation of transforming growth factor beta receptor signaling pathway | 8 | 1.37931034 | 0.00440080 |
| MF | GO:0098911~regulation of ventricular cardiac muscle cell action potential | 4 | 0.68965517 | 0.00452268 |
| MF | GO:0000165~MAPK cascade | 18 | 3.10344827 | 0.00502503 |
| MF | GO:0038061~NIK/NF-kappaB signaling | 8 | 1.37931034 | 0.00522235 |
| MF | GO:0090263~positive regulation of canonical Wnt signaling pathway | 11 | 1.89655172 | 0.00542574 |
| MF | GO:0006446~regulation of translational initiation | 6 | 1.03448275 | 0.00562616 |
| MF | GO:0006888~ER to Golgi vesicle-mediated transport | 13 | 2.24137931 | 0.00570200 |
| MF | GO:0000209~protein polyubiquitination | 14 | 2.41379310 | 0.00673156 |
| MF | GO:0001568~blood vessel development | 6 | 1.03448275 | 0.00710736 |
| MF | GO:0010952~positive regulation of peptidase activity | 4 | 0.68965517 | 0.00747212 |
| MF | GO:0010288~response to lead ion | 4 | 0.68965517 | 0.00747212 |
| MF | GO:0001701~in utero embryonic development | 14 | 2.41379310 | 0.00767342 |
| MF | GO:0008333~endosome to lysosome transport | 6 | 1.03448275 | 0.00794140 |
| MF | GO:0032570~response to progesterone | 6 | 1.03448275 | 0.00794140 |
| MF | GO:0050680~negative regulation of epithelial cell proliferation | 7 | 1.20689655 | 0.00902897 |
| MF | GO:0032922~circadian regulation of gene expression | 7 | 1.20689655 | 0.00982404 |
| MF | GO:0043001~Golgi to plasma membrane protein transport | 5 | 0.86206896 | 0.01037989 |
| MF | GO:0051437~positive regulation of ubiquitin-protein ligase activity involved in regulation of mitotic cell cycle transition | 8 | 1.37931034 | 0.01115171 |
| MF | GO:0090141~positive regulation of mitochondrial fission | 4 | 0.68965517 | 0.01133253 |
| MF | GO:0010633~negative regulation of epithelial cell migration | 4 | 0.68965517 | 0.01133253 |
| MF | GO:0030336~negative regulation of cell migration | 9 | 1.55172413 | 0.01156183 |
| MF | GO:0000086~G2/M transition of mitotic cell cycle | 11 | 1.89655172 | 0.01326172 |
| MF | GO:0007155~cell adhesion | 25 | 4.31034482 | 0.01400847 |
| MF | GO:0008283~cell proliferation | 21 | 3.62068965 | 0.01530906 |
| MF | GO:0045944~positive regulation of transcription from RNA polymerase II promoter | 45 | 7.75862069 | 0.01643695 |
| MF | GO:0009267~cellular response to starvation | 6 | 1.03448275 | 0.01716619 |
| MF | GO:0043488~regulation of mRNA stability | 9 | 1.55172413 | 0.01813852 |
| MF | GO:0048842~positive regulation of axon extension involved in axon guidance | 3 | 0.51724137 | 0.01953936 |
| MF | GO:0045892~negative regulation of transcription, DNA-templated | 26 | 4.48275862 | 0.019915853 |
| MF | GO:0001938~positive regulation of endothelial cell proliferation | 7 | 1.20689655 | 0.02355701 |
| MF | GO:0030198~extracellular matrix organization | 13 | 2.24137931 | 0.02522590 |
| MF | GO:0001890~placenta development | 5 | 0.86206896 | 0.02532673 |
| MF | GO:0038180~nerve growth factor signaling pathway | 3 | 0.51724137 | 0.02550248 |
| MF | GO:0033598~mammary gland epithelial cell proliferation | 3 | 0.51724137 | 0.02550248 |
| MF | GO:0007369~gastrulation | 4 | 0.68965517 | 0.02872886 |
| MF | GO:0045921~positive regulation of exocytosis | 4 | 0.68965517 | 0.02872886 |
| MF | GO:0007179~transforming growth factor beta receptor signaling pathway | 8 | 1.37931034 | 0.02895098 |
| MF | GO:0098609~cell-cell adhesion | 16 | 2.75862069 | 0.02992254 |
| MF | GO:0008584~male gonad development | 8 | 1.37931034 | 0.03205028 |
| MF | GO:0006413~translational initiation | 10 | 1.72413793 | 0.03327508 |
| MF | GO:0007411~axon guidance | 11 | 1.89655172 | 0.03328617 |
| MF | GO:0016032~viral process | 17 | 2.93103448 | 0.03339470 |
| MF | GO:0007173~epidermal growth factor receptor signaling pathway | 6 | 1.03448275 | 0.03385413 |
| MF | GO:0043065~positive regulation of apoptotic process | 17 | 2.93103448 | 0.03425816 |
| MF | GO:0016925~protein sumoylation | 9 | 1.55172413 | 0.03544518 |
| MF | GO:0090090~negative regulation of canonical Wnt signaling pathway | 11 | 1.89655172 | 0.03845093 |
| MF | GO:0006606~protein import into nucleus | 6 | 1.03448275 | 0.03857010 |
| MF | GO:0010508~positive regulation of autophagy | 5 | 0.86206896 | 0.03902577 |
| MF | GO:0043124~negative regulation of I-kappaB kinase/NF-kappaB signaling | 5 | 0.86206896 | 0.03902577 |
| MF | GO:0046426~negative regulation of JAK-STAT cascade | 5 | 0.86206896 | 0.03902577 |
| MF | GO:0036498~IRE1-mediated unfolded protein response | 6 | 1.03448275 | 0.04107090 |
| MF | GO:0009612~response to mechanical stimulus | 6 | 1.03448275 | 0.04107090 |
| MF | GO:0031145~anaphase-promoting complex-dependent catabolic process | 7 | 1.20689655 | 0.04192140 |
| MF | GO:0030433~ER-associated ubiquitin-dependent protein catabolic process | 6 | 1.03448275 | 0.04366765 |
| MF | GO:0043547~positive regulation of GTPase activity | 27 | 4.65517241 | 0.04387547 |
| MF | GO:0034198~cellular response to amino acid starvation | 4 | 0.68965517 | 0.04522048 |
| MF | GO:0060135~maternal process involved in female pregnancy | 4 | 0.68965517 | 0.04522048 |
| MF | GO:2000134~negative regulation of G1/S transition of mitotic cell cycle | 4 | 0.68965517 | 0.04522048 |
| MF | GO:0032092~positive regulation of protein binding | 6 | 1.03448275 | 0.04636075 |
| MF | GO:0003181~atrioventricular valve morphogenesis | 3 | 0.51724137 | 0.04700501 |
| MF | GO:0005978~glycogen biosynthetic process | 4 | 0.68965517 | 0.04993596 |
| CC | GO:0005829~cytosol | 177 | 30.5172413 | 1.84E-14 |
| CC | GO:0070062~extracellular exosome | 137 | 23.6206896 | 2.72E-08 |
| CC | GO:0005737~cytoplasm | 209 | 36.0344827 | 9.57E-06 |
| CC | GO:0015629~actin cytoskeleton | 20 | 3.44827586 | 4.94E-05 |
| CC | GO:0005739~mitochondrion | 67 | 11.5517241 | 8.84E-05 |
| CC | GO:0005911~cell-cell junction | 17 | 2.93103448 | 8.91E-05 |
| CC | GO:0005925~focal adhesion | 28 | 4.82758620 | 9.01E-05 |
| CC | GO:0005654~nucleoplasm | 120 | 20.6896551 | 1.03E-04 |
| CC | GO:0005794~Golgi apparatus | 48 | 8.27586206 | 1.21E-04 |
| CC | GO:0016020~membrane | 97 | 16.7241379 | 2.71E-04 |
| CC | GO:0042383~sarcolemma | 11 | 1.89655172 | 2.86E-04 |
| CC | GO:0005764~lysosome | 18 | 3.10344827 | 6.84E-04 |
| CC | GO:0031012~extracellular matrix | 21 | 3.62068965 | 9.35E-04 |
| CC | GO:0048471~perinuclear region of cytoplasm | 35 | 6.03448275 | 9.47E-04 |
| CC | GO:0005634~nucleus | 202 | 34.8275862 | 0.00108613 |
| CC | GO:0005769~early endosome | 17 | 2.93103448 | 0.00208926 |
| CC | GO:0005770~late endosome | 11 | 1.89655172 | 0.00457263 |
| CC | GO:0043202~lysosomal lumen | 9 | 1.55172413 | 0.00472341 |
| CC | GO:0005913~cell-cell adherens junction | 20 | 3.44827586 | 0.00575615 |
| CC | GO:0005730~nucleolus | 41 | 7.06896551 | 0.00629559 |
| CC | GO:0001726~ruffle | 9 | 1.55172413 | 0.00665931 |
| CC | GO:0000790~nuclear chromatin | 14 | 2.41379310 | 0.00710792 |
| CC | GO:0015630~microtubule cytoskeleton | 11 | 1.89655172 | 0.01012874 |
| CC | GO:0005604~basement membrane | 8 | 1.37931034 | 0.01102883 |
| CC | GO:0005789~endoplasmic reticulum membrane | 40 | 6.89655172 | 0.01121537 |
| CC | GO:0005765~lysosomal membrane | 17 | 2.93103448 | 0.01148985 |
| CC | GO:0010008~endosome membrane | 13 | 2.24137931 | 0.01255156 |
| CC | GO:0005759~mitochondrial matrix | 19 | 3.27586206 | 0.01339828 |
| CC | GO:0032588~trans-Golgi network membrane | 8 | 1.37931034 | 0.01423005 |
| CC | GO:0005901~caveola | 7 | 1.20689655 | 0.01499332 |
| CC | GO:0005783~endoplasmic reticulum | 38 | 6.55172413 | 0.01548460 |
| CC | GO:0043025~neuronal cell body | 18 | 3.10344827 | 0.01890456 |
| CC | GO:0016324~apical plasma membrane | 17 | 2.93103448 | 0.01918268 |
| CC | GO:0043209~myelin sheath | 11 | 1.89655172 | 0.01976212 |
| CC | GO:0005578~proteinaceous extracellular matrix | 16 | 2.75862069 | 0.02000396 |
| CC | GO:0005758~mitochondrial intermembrane space | 7 | 1.20689655 | 0.02672667 |
| CC | GO:0030027~lamellipodium | 11 | 1.89655172 | 0.02704171 |
| CC | GO:0030133~transport vesicle | 8 | 1.37931034 | 0.02772776 |
| CC | GO:0030119~AP-type membrane coat adaptor complex | 3 | 0.51724137 | 0.0296985 |
| CC | GO:0030425~dendrite | 18 | 3.10344827 | 0.03180260 |
| CC | GO:0005743~mitochondrial inner membrane | 22 | 3.79310344 | 0.03377030 |
| CC | GO:0000502~proteasome complex | 6 | 1.03448275 | 0.03755886 |
| CC | GO:0000793~condensed chromosome | 4 | 0.68965517 | 0.04073962 |
| CC | GO:0030176~integral component of endoplasmic reticulum membrane | 8 | 1.37931034 | 0.04225781 |
| CC | GO:0005813~centrosome | 21 | 3.62068965 | 0.04273844 |
| CC | GO:0030424~axon | 13 | 2.24137931 | 0.04351787 |
| CC | GO:0000139~Golgi membrane | 27 | 4.65517241 | 0.04657874 |
| CC | GO:0005768~endosome | 13 | 2.24137931 | 0.04773304 |
| CC | GO:0014704~intercalated disc | 5 | 0.86206896 | 0.04958227 |
| MF | GO:0005515~protein binding | 367 | 67.7121771 | 4.35E-21 |
| MF | GO:0008201~heparin binding | 18 | 3.32103321 | 6.77E-06 |
| MF | GO:0044822~poly(A) RNA binding | 56 | 10.3321033 | 2.77E-04 |
| MF | GO:0019899~enzyme binding | 22 | 4.05904059 | 0.00120403 |
| MF | GO:0016504~peptidase activator activity | 4 | 0.73800738 | 0.00277588 |
| MF | GO:0003682~chromatin binding | 23 | 4.24354243 | 0.00378577 |
| MF | GO:0033613~activating transcription factor binding | 5 | 0.92250922 | 0.00385203 |
| MF | GO:0035257~nuclear hormone receptor binding | 5 | 0.92250922 | 0.00385203 |
| MF | GO:0051015~actin filament binding | 11 | 2.030 | 0.00659886 |
| MF | GO:0051117~ATPase binding | 8 | 1.476 | 0.00678785 |
| MF | GO:0098641~cadherin binding involved in cell-cell adhesion | 18 | 3.321 | 0.007 |
| MF | GO:0019838~growth factor binding | 5 | 0.923 | 0.00820984 |
| MF | GO:0004843~thiol-dependent ubiquitin-specific protease activity | 8 | 1.47601476 | 0.010 |
| MF | GO:0003713~transcription coactivator activity | 15 | 2.768 | 0.018 |
| MF | GO:0008565~protein transporter activity | 7 | 1.292 | 0.02115073 |
| MF | GO:0001105~RNA polymerase II transcription coactivator activity | 5 | 0.923 | 0.024 |
| MF | GO:0005518~collagen binding | 6 | 1.107 | 0.034 |
| MF | GO:0003743~translation initiation factor activity | 6 | 1.107 | 0.036 |
| MF | GO:0005178~integrin binding | 8 | 1.476 | 0.039 |
| MF | GO:0051020~GTPase binding | 4 | 0.738 | 0.042 |
| MF | GO:0003779~actin binding | 15 | 2.768 | 0.043 |
| MF | GO:0030165~PDZ domain binding | 7 | 1.292 | 0.045 |
| MF | GO:0004871~signal transducer activity | 12 | 2.214 | 0.045 |
| MF | GO:0000983~transcription factor activity, RNA polymerase II core promoter sequence-specific | 3 | 0.554 | 0.049 |
| MF | GO:0042974~retinoic acid receptor binding | 3 | 0.554 | 0.049 |
| MF | GO:0008134~transcription factor binding | 15 | 2.768 | 0.049 |
| KEGG | hsa05200Pathways in cancer | 36 | 6.207 | 4.770 |
| KEGG | hsa05220Chronic myeloid leukemia | 12 | 2.069 | 1.174 |
| KEGG | hsa05205Proteoglycans in cancer | 19 | 3.276 | 1.540 |
| KEGG | hsa05165human papillomavirus infection | 24 | 4.138 | 3.821 |
| KEGG | hsa04014Ras signaling pathway | 20 | 3.44827586 | 5.1554E-07 |
| KEGG | hsa04216Ferroptosis | 8 | 1.37931034 | 4.07E-06 |
| KEGG | hsa04919thyroid hormone signaling pathway | 12 | 2.06896551 | 9.4839E-06 |
| KEGG | hsa04510Focal adhesion | 16 | 2.75862069 | 1.1181E-05 |
| KEGG | hsa04142Lysosome | 12 | 2.06896551 | 2.4390E-05 |
| KEGG | hsa05224Breast cancer | 13 | 2.24137931 | 3.3561E-05 |
| KEGG | hsa04010MAPK signaling pathway | 19 | 3.27586206 | 4.2364E-05 |
| KEGG | hsa04151PI3K-Akt signaling pathway | 21 | 3.62068965 | 4.8539E-05 |
| KEGG | hsa05212Pancreatic cancer | 9 | 1.55172413 | 4.8663E-05 |
| KEGG | hsa04141Protein processing in endoplasmic reticulum | 13 | 2.24137931 | 5.2130E-05 |
| KEGG | hsa04144Endocytosis | 17 | 2.93103448 | 5.3925E-05 |
| KEGG | hsa04714thermogenesis | 17 | 2.93103448 | 5.6444E-05 |
| KEGG | hsa04390Hippo signaling pathway | 13 | 2.24137931 | 7.0352E-05 |
| KEGG | hsa05146Amoebiasis | 10 | 1.72413793 | 7.5252E-05 |
| KEGG | hsa04015Rap1 signaling pathway | 15 | 2.58620689 | 8.6060E-05 |
| KEGG | hsa03013RNA transport | 13 | 2.24137931 | 9.93E-05 |
| KEGG | hsa05144Malaria | 7 | 1.20689655 | 0.00013146 |
| KEGG | hsa04270Vascular smooth muscle contraction | 11 | 1.89655172 | 0.00013259 |
| KEGG | hsa05216Thyroid cancer | 6 | 1.03448275 | 0.00013687 |
| KEGG | hsa05210Colorectal cancer | 9 | 1.55172413 | 0.00014202 |
| KEGG | hsa05202Transcriptional misregulation in cancer | 13 | 2.24137931 | 0.00034113 |
| KEGG | hsa04933AGE-RAGE signaling pathway in diabetic complications | 9 | 1.55172413 | 0.00037821 |
| KEGG | hsa04910Insulin signaling pathway | 11 | 1.89655172 | 0.00038875 |
| KEGG | hsa04710Circadian rhythm | 5 | 0.8620689 | 0.00039910 |
| KEGG | hsa04110Cell cycle | 10 | 1.7241379 | 0.00042306 |
| KEGG | hsa04140Autophagy - animal | 10 | 1.7241379 | 0.00042306 |
| KEGG | hsa04211Longevity regulating pathway | 9 | 1.5517241 | 0.00043374 |
| KEGG | hsa05166Human T-cell leukemia virus 1 infection | 16 | 2.7582069 | 0.00045881 |
| KEGG | hsa04962Vasopressin-regulated water reabsorption | 6 | 1.0344827 | 0.00049295 |
| KEGG | hsa05163human cytomegalovirus infection | 14 | 2.4137931 | 0.00050066 |
| KEGG | hsa05416Viral myocarditis | 7 | 1.2068965 | 0.00059551 |
| KEGG | hsa04380Osteoclast differentiation | 10 | 1.7241379 | 0.00060075 |
| KEGG | hsa01200Carbon metabolism | 9 | 1.5517241 | 0.00060240 |
| KEGG | hsa00280Valine, leucine and isoleucine degradation | 6 | 1.0344827 | 0.00068126 |
| KEGG | hsa04350TGF-beta signaling pathway | 8 | 1.3793103 | 0.00068202 |
| KEGG | hsa04066HIF-1 signaling pathway | 9 | 1.5517241 | 0.00082129 |
| KEGG | hsa01522Endocrine resistance | 8 | 1.3793103 | 0.00084164 |
| KEGG | hsa01230Biosynthesis of amino acids | 7 | 1.2068965 | 0.00090273 |
| KEGG | hsa04022cGMP-PKG signaling pathway | 11 | 1.8965517 | 0.00097247 |
| KEGG | hsa05222Small cell lung cancer | 8 | 1.3793103 | 0.00102994 |
| KEGG | hsa00920Sulfur metabolism | 3 | 0.5172413 | 0.00127129 |
| KEGG | hsa04530Tight junction | 11 | 1.8965517 | 0.00128194 |
| KEGG | hsa04810Regulation of actin cytoskeleton | 13 | 2.2413793 | 0.00132276 |
| KEGG | hsa05164Influenza A | 11 | 1.8965517 | 0.00146463 |
| KEGG | hsa04150mTOR signaling pathway | 10 | 1.7241379 | 0.00168742 |
| KEGG | hsa00860Porphyrin and chlorophyll metabolism | 5 | 0.8620689 | 0.00184573 |
| KEGG | hsa00330Arginine and proline metabolism | 6 | 1.0344827 | 0.00203846 |
| KEGG | hsa04926relaxin signaling pathway | 9 | 1.5517241 | 0.00209212 |
| KEGG | hsa00350Tyrosine metabolism | 5 | 0.8620689 | 0.00226503 |
| KEGG | hsa04120Ubiquitin mediated proteolysis | 9 | 1.5517241 | 0.00231085 |
| KEGG | hsa04928parathyroid hormone synthesis, secretion and action | 8 | 1.3793103 | 0.00239883 |
| KEGG | hsa04320Dorso-ventral axis formation | 4 | 0.6896551 | 0.00247095 |
| KEGG | hsa04360Axon guidance | 11 | 1.8965517 | 0.00262089 |
| KEGG | hsa03050Proteasome | 5 | 0.8620689 | 0.00274966 |
| KEGG | hsa05145Toxoplasmosis | 8 | 1.3793103 | 0.00282350 |
| KEGG | hsa05221Acute myeloid leukemia | 6 | 1.0344827 | 0.00321461 |
| KEGG | hsa04012ErbB signaling pathway | 7 | 1.2068965 | 0.00333388 |
| KEGG | hsa04974Protein digestion and absorption | 7 | 1.2068965 | 0.00333388 |
| KEGG | hsa04915Estrogen signaling pathway | 9 | 1.5517241 | 0.00337383 |
| KEGG | hsa00380Tryptophan metabolism | 5 | 0.8620689 | 0.00361123 |
| KEGG | hsa04961Endocrine and other factor-regulated calcium reabsorption | 5 | 0.8620689 | 0.00361123 |
| KEGG | hsa05012Parkinson disease | 10 | 1.7241379 | 0.00384343 |
| KEGG | hsa05169Epstein-Barr virus infection | 14 | 2.4137931 | 0.00392801 |
| KEGG | hsa04978Mineral absorption | 5 | 0.8620689 | 0.00465102 |
| KEGG | hsa05225hepatocellular carcinoma | 10 | 1.7241379 | 0.00467321 |
| KEGG | hsa04917Prolactin signaling pathway | 6 | 1.0344827 | 0.00483464 |
| KEGG | hsa04071Sphingolipid signaling pathway | 8 | 1.3793103 | 0.00513608 |
| KEGG | hsa05230Central carbon metabolism in cancer | 6 | 1.0344827 | 0.00548850 |
| KEGG | hsa04916Melanogenesis | 7 | 1.2068965 | 0.00611658 |
| KEGG | hsa04921Oxytocin signaling pathway | 9 | 1.5517241 | 0.00636986 |
| KEGG | hsa04520Adherens junction | 6 | 1.0344827 | 0.00658730 |
| KEGG | hsa05226gastric cancer | 9 | 1.5517241 | 0.00662516 |
| KEGG | hsa05142Chagas disease | 7 | 1.2068965 | 0.00676733 |
| KEGG | hsa05231Choline metabolism in cancer | 7 | 1.2068965 | 0.00676733 |
| KEGG | hsa05231Melanoma | 6 | 1.0344827 | 0.00740328 |
| KEGG | hsa04024cAMP signaling pathway | 11 | 1.8965517 | 0.00756184 |
| KEGG | hsa04068foxo signaling pathway | 8 | 1.3793103 | 0.00765796 |
| KEGG | hsa05170human immunodeficiency virus 1 infection | 11 | 1.8965517 | 0.00830693 |
| KEGG | hsa04145Phagosome | 9 | 1.5517241 | 0.00832558 |
| KEGG | hsa05160Hepatitis C | 9 | 1.5517241 | 0.00863851 |
| KEGG | hsa04062Chemokine signaling pathway | 10 | 1.7241379 | 0.009483216 |
| KEGG | hsa04218cellular senescence | 9 | 1.5517241 | 0.009980183 |
